# Supplementary material for: Identification of Candidate Genes for Salt Tolerance at Seedling Stage in Rice Using QTL-Seq and Chromosome Segment Substitution Line-Derived Population
Source: MDPI journal article supplement (doi:10.3390/agronomy14050929), 2024-04-28
Supplement: s1 [file s1]

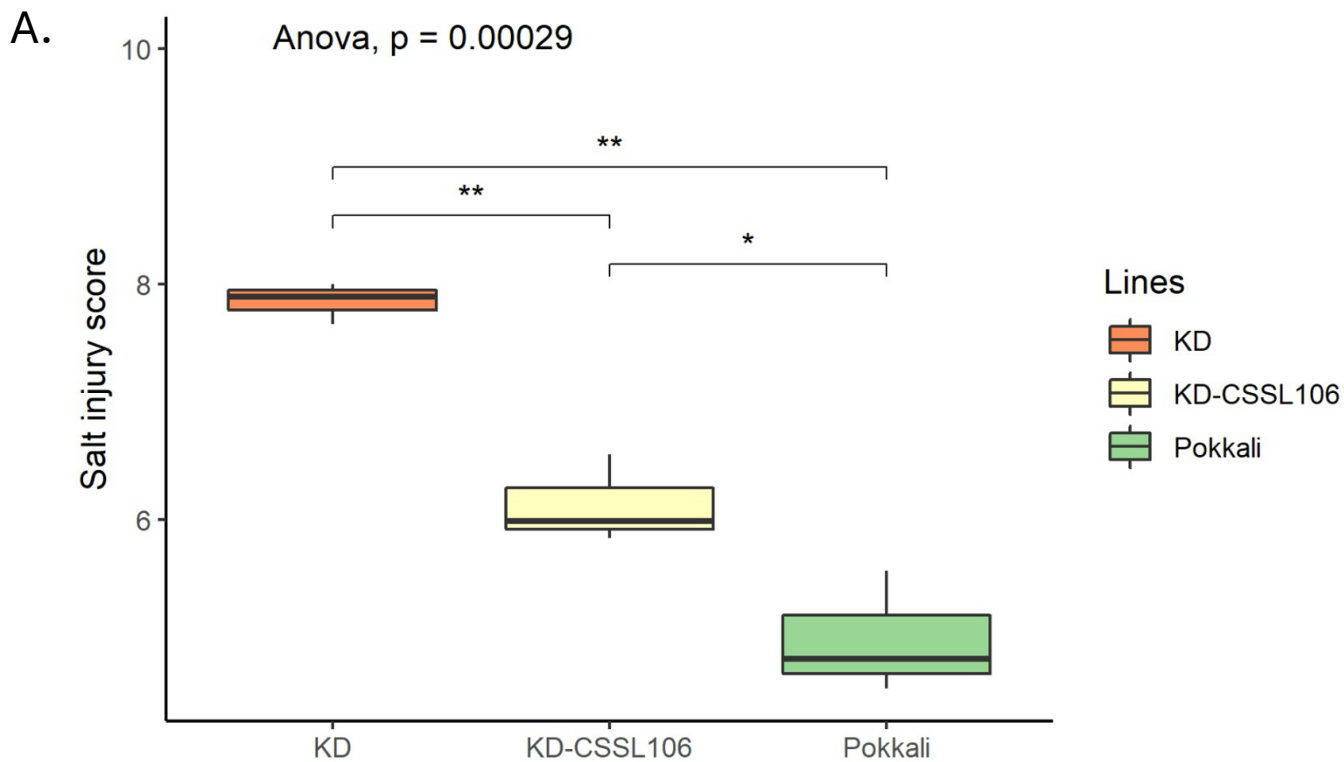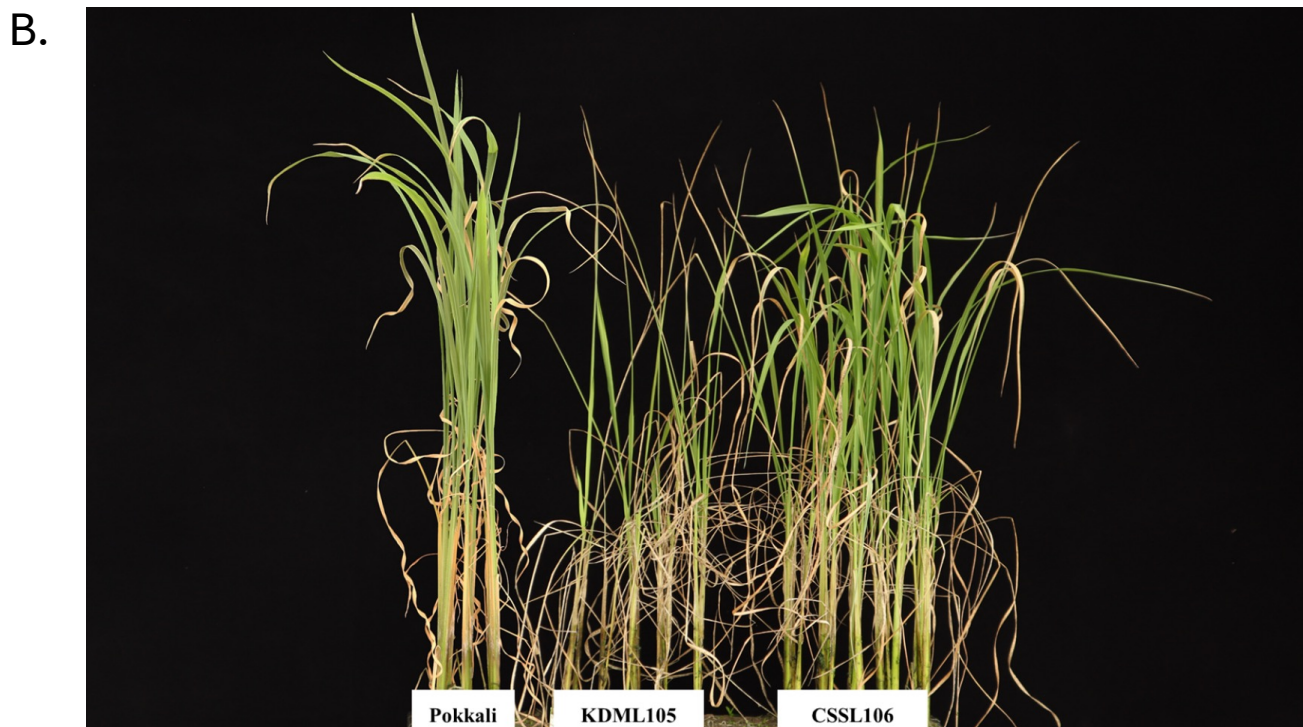

**Figure S2.** Salt tolerance screening in the parental lines. (A.) SIS score and (B.) salt injury symptom of KDML105 (KD), KD-CSSL106 (CSSL106) and Pokkali.
