# Supplementary material for: Identification of Candidate Genes for Salt Tolerance at Seedling Stage in Rice Using QTL-Seq and Chromosome Segment Substitution Line-Derived Population
Source: MDPI journal article supplement (doi:10.3390/agronomy14050929), 2024-04-28
Supplement: s1 [file s1]

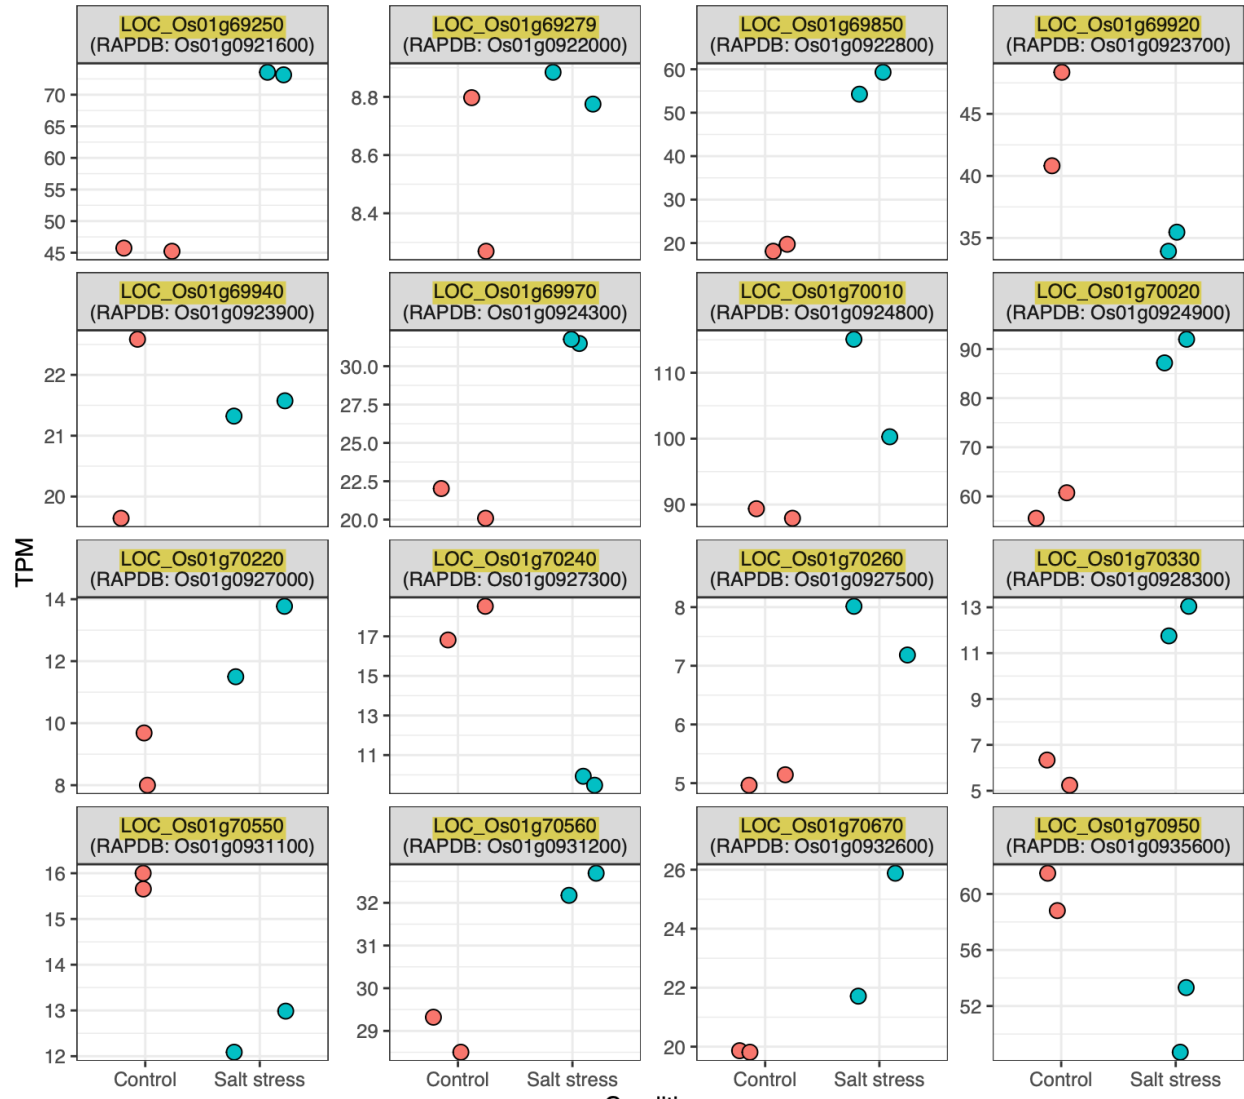

Figure S3. Selected genes from transcriptome data of KDML105, 1 day after salt stress. Two replicates in each condition are presented as red and green dots. The X axis shows the two conditions, and Y-axis shows TPM (transcripts per million) value.
