# Supplementary material for: Identification of Candidate Genes for Salt Tolerance at Seedling Stage in Rice Using QTL-Seq and Chromosome Segment Substitution Line-Derived Population
Source: MDPI journal article supplement (doi:10.3390/agronomy14050929), 2024-04-28
Supplement: s1 [file s1]

Archive with 14 entries (14 files):
- Figure S1 - Breeding scheme of F2.pdf
- __MACOSX/._Figure S1 - Breeding scheme of F2.pdf
- Figure S2 - SIS of parents.pdf
- __MACOSX/._Figure S2 - SIS of parents.pdf
- Figure S3 - KDML105 expression.pdf
- __MACOSX/._Figure S3 - KDML105 expression.pdf
- Figure S4 - DH103 expression.pdf
- __MACOSX/._Figure S4 - DH103 expression.pdf
- Table S1 - Single marker analysis.xlsx
- __MACOSX/._Table S1 - Single marker analysis.xlsx
- Table S2 - Candidate genes.xlsx
- __MACOSX/._Table S2 - Candidate genes.xlsx
- Table S3 - SNPs with effects.xlsx
- __MACOSX/._Table S3 - SNPs with effects.xlsx
