# Supplementary material for: Identification of Candidate Genes for Salt Tolerance at Seedling Stage in Rice Using QTL-Seq and Chromosome Segment Substitution Line-Derived Population
Source: MDPI journal article supplement (doi:10.3390/agronomy14050929), 2024-04-28
Supplement: s1 [file s1 › Table S1 - Single marker analysis.xlsx]

## Sheet: Sheet1
Table S1. Single marker analysis using KASP markers
No.	Marker	Chr.	Position	PVE	P-value
1	KASP_01_40276157	1	40276157	0.0549	0.1184
2	KASP_01_40276790	1	40276790	0.0682	0.1133
3	KASP_01_40276934	1	40276934	0.089	0.0689
4	KASP_01_40277464	1	40277464	0.0767	0.0924
5	KASP_01_40278000	1	40278000	0.089	0.0689
6	KASP_01_40278185	1	40278185	0.089	0.0689
7	KASP_01_40281555	1	40281555	0.0909	0.0658
8	KASP_01_40282160	1	40282160	0.076	0.0924
9	KASP_01_40282581	1	40282581	0.089	0.0689
10	KASP_01_40283342	1	40283342	0.0745	0.0973
11	KASP_01_40287206	1	40287206	0.0662	0.119
12	KASP_01_40322616	1	40322616	0.0767	0.0924
13	KASP_01_40334085	1	40334085	0.0767	0.0924
14	KASP_01_40334953	1	40334953	0.089	0.0689
15	KASP_01_40335309	1	40335309	0.0538	0.0864
16	KASP_01_40336634	1	40336634	0.089	0.0689
17	KASP_01_40337631	1	40337631	0.0767	0.0924
18	KASP_01_40362776	1	40362776	0.0667	0.2355
19	KASP_01_40388416	1	40388416	0.0739	0.2548
20	KASP_01_40400006	1	40400006	0.0582	0.0671
21	KASP_01_40402297	1	40402297	0.0677	0.2629
22	KASP_01_40404898	1	40404898	0.0504	0.156
23	KASP_01_40406084	1	40406084	0.089	0.0176
24	KASP_01_40477466	1	40477466	0.089	0.0689
25	KASP_01_40496913	1	40496913	0.1149	0.0374
26	KASP_01_40503164	1	40503164	0.1149	0.0374
27	KASP_01_41586818	1	41586818	0.0603	0.1359
28	KASP_01_41840892	1	41840892	0.0276	0.2189
