# Supplementary material for: Identification of Candidate Genes for Salt Tolerance at Seedling Stage in Rice Using QTL-Seq and Chromosome Segment Substitution Line-Derived Population
Source: MDPI journal article supplement (doi:10.3390/agronomy14050929), 2024-04-28
Supplement: s1 [file s1 › Table S2 - Candidate genes.xlsx]

## Sheet: Sheet1
Table S2. Candidate genes identified within the QTL region.
﻿Chr	Start	Stop	MSU Locus ID	RAP-DB locus ID	Annotation	Gene expression
						1 day under salt stress			5 days under salt stress
						KDML105 (TPM)	DH103 (TPM)	Significant DEG (up- or down-regulated in DH103)	KDML105 (TPM)	DH103 (TPM)	Significant DEG
1	40200998	40203691	LOC_Os01g69160	Os01g0920700	regulatory protein, putative, expressed	#N/A	#N/A		#N/A	#N/A
1	40205112	40206882	LOC_Os01g69174	Os01g0920800	expressed protein	0.064887	0		0	0
1	40211197	40213481	LOC_Os01g69190	Os01g0921000	regulatory protein, putative, expressed	0.162187	0.481427		0.428171	0.186209
1	40215071	40216944	LOC_Os01g69200	Os01g0921100	regulatory protein, putative, expressed	1.52001	2.14591		2.20325	1.87009
1	40221119	40226593	LOC_Os01g69210	Os01g0921200	mannosyl-oligosaccharide glucosidase, putative, expressed	12.1112	8.25624		14.3457	13.159
1	40230199	40233220	LOC_Os01g69220	Os01g0921300	exostosin family domain containing protein, expressed	17.8505	19.4244		24.4831	21.4874
1	40235090	40238446	LOC_Os01g69230	Os01g0921400	exo70 exocyst complex subunit domain containing protein, expressed	19.6574	16.0253		17.3836	15.8969
1	40238685	40240454	LOC_Os01g69240	Os01g0921500	CBS domain containing membrane protein, putative, expressed	0.067618	0.169774		0	0.034758
1	40240807	40244736	LOC_Os01g69250	Os01g0921600	mitochondrial import receptor subunit TOM20, putative, expressed	73.345	26.1495	Down (pval = 0.0078)	46.3916	54.8019
1	40252603	40255416	LOC_Os01g69260	None	hypothetical protein	#N/A	#N/A		#N/A	#N/A
1	40256803	40258472	LOC_Os01g69270	Os01g0921800	OsFBO2 - F-box and other domain containing protein, expressed	13.1621	13.9881		12.9645	16.8485
1	40275509	40278162	LOC_Os01g69279	Os01g0922000	expressed protein	8.82976	12.0143	Up (pval = 0.0020)	13.5446	12.6838
1	40285366	40287178	LOC_Os01g69290	Os01g0922100	antifreeze glycoprotein, putative, expressed	11.2098	3.83228		5.2391	10.8744
1	40331733	40335718	LOC_Os01g69830	Os01g0922600	OsSPL2 - SBP-box gene family member, expressed	15.7935	6.99105		13.4403	11.5424
1	40336733	40337314	LOC_Os01g69840	Os01g0922700	expressed protein	0.556409	0.330348		0.492982	0.192993
1	40344329	40364584	LOC_Os01g69850	Os01g0922800	OsMADS65 - MADS-box family gene with MIKC* type-box, expressed	56.7853	70.136	Up (pval = 0.0064)	57.7969	88.2609	Up (pval = 0.0078)
1	40371949	40373618	LOC_Os01g69870	Os01g0923000	expressed protein	10.9119	6.54391		4.96138	7.11882
1	40379245	40379472	LOC_Os01g69890	Os01g0923200	expressed protein	5.65633	6.20473		1.25749	2.9524
1	40385312	40389442	LOC_Os01g69900	Os01g0923300	CBS domain-containing protein, putative, expressed	42.5546	43.3586		41.4336	44.7833
1	40390390	40393123	LOC_Os01g69904	Os01g0923400	expressed protein	0	0.0131245		0	6.31349
1	40397315	40403249	LOC_Os01g69910	Os01g0923600	calmodulin-binding transcription activator, putative, expressed	20.1994	19.1359		34.6017	31.2007
1	40403715	40409615	LOC_Os01g69920	Os01g0923700	histidine kinase, putative, expressed	34.6986	47.7579	Up (pval = 0.0431)	52.2677	47.7547
1	40438233	40442444	LOC_Os01g69930	Os01g0923800	dnaJ domain containing protein, expressed	0.078045	0.027412		0.0508425	0.0260475
1	40442828	40446423	LOC_Os01g69940	Os01g0923900	OsFBX32 - F-box domain containing protein, expressed	21.45	25.5271	Up (pval = 0.0372)	26.2334	24.028
1	40453829	40456679	LOC_Os01g69950	Os01g0924000	ribosomal protein L27, putative, expressed	500.339	564.189		364.988	410.34
1	40460001	40461483	LOC_Os01g69960	Os01g0924200	expressed protein	1.29835	2.00374		2.25092	1.34536
1	40463007	40467759	LOC_Os01g69970	Os01g0924300	WD domain, G-beta repeat domain containing protein, expressed	31.6189	13.976	Down (pval = 0313)	24.2238	24.1544
1	40477480	40478907	LOC_Os01g69980	Os01g0924400	TCP family transcription factor, putative, expressed	23.059	29.3727		33.8869	35.4987
1	40483305	40489660	LOC_Os01g69990	Os01g0924600	GYF domain containing protein, putative, expressed	32.1608	33.4295		39.3486	35.2445
1	40493694	40495715	LOC_Os01g70000	Os01g0924700	expressed protein	0	0		0	0
1	40496343	40498279	LOC_Os01g70010	Os01g0924800	ribosomal protein L7Ae, putative, expressed	107.685	38.7463	Down (pval = 7.65E-08)	99.3742	43.0441	Down (pval = 1.76E-06)
1	40501147	40507790	LOC_Os01g70020	Os01g0924900	DEK C terminal domain containing protein, expressed	89.5848	25.8763	Down (pval = 0.0094)	55.6039	62.6961
1	40526591	40527112	LOC_Os01g70050	Os01g0924966	OsSAUR3 - Auxin-responsive SAUR gene family member, expressed	0.521834	0.2421		0.341939	0.139855
1	40540964	40554738	LOC_Os01g70060	Os01g0925000	protein of unknown function, DUF618 domain containing protein, expressed	15.1144	12.6571		15.7339	16.5984
1	40556007	40561361	LOC_Os01g70080	Os01g0925100	NB-ARC domain containing protein, expressed	0.186246	0.177903		0.259373	0.232841
1	40563530	40566440	LOC_Os01g70090	Os01g0925200	enoyl-CoA hydratase/isomerase family protein, putative, expressed	11.5326	10.9949		19.076	20.2137
1	40566660	40569777	LOC_Os01g70100	Os01g0925300	zinc finger DHHC domain-containing protein, putative, expressed	21.8897	7.69468		11.1827	16.0913
1	40572819	40574020	LOC_Os01g70110	Os01g0925400	No apical meristem protein, putative, expressed	11.0439	6.50983		10.9249	11.593
1	40584383	40586080	LOC_Os01g70120	Os01g0925600	expressed protein	0	0		0.0638015	0
1	40584971	40591179	LOC_Os01g70130	Os01g0925700	protein kinase domain containing protein, expressed	19.4877	31.2641		40.3678	25.1776
1	40595852	40599111	LOC_Os01g70140	Os01g0925800	ubiquitin-conjugating enzyme E2-22 kDa, putative, expressed	71.7312	58.5956		65.5396	63.2593
1	40601294	40602413	LOC_Os01g70150	Os01g0925900	expressed protein	#N/A	#N/A		#N/A	#N/A
1	40607531	40610341	LOC_Os01g70160	Os01g0926200	zinc finger, C3HC4 type domain containing protein, expressed	30.7324	29.1206		34.8228	31.4479
1	40610513	40613463	LOC_Os01g70170	Os01g0926300	transaldolase, putative, expressed	155.732	98.7686		153.562	134.292
1	40615700	40617229	LOC_Os01g70180	Os01g0926400	exostosin family domain containing protein, expressed	19.3761	18.6192		16.9091	17.0603
1	40626011	40629506	LOC_Os01g70190	Os01g0926600	exostosin family domain containing protein, expressed	87.4685	87.6726		98.1885	82.3311
1	40633090	40636112	LOC_Os01g70200	Os01g0926700	exostosin family domain containing protein, expressed	147.931	94.4756		165.395	133.101
1	40644597	40648434	LOC_Os01g70210	Os01g0926800	CRAL/TRIO domain containing protein, expressed	22.8121	33.7074		54.7389	37.6422
1	40654188	40664396	LOC_Os01g70220	Os01g0927000	histone-lysine N-methyltransferase, putative, expressed	12.6344	0.968209	Down (pval = 0.0055)	5.72568	8.43238
1	40665090	40666542	LOC_Os01g70230	Os01g0927200	transcription factor, putative, expressed	#N/A	#N/A		#N/A	#N/A
1	40668623	40671874	LOC_Os01g70240	Os01g0927300	expressed protein	9.70481	16.165	Up (pval = 0.0353)	13.1196	8.88121
1	40674891	40677841	LOC_Os01g70250	Os01g0927400	heat shock protein DnaJ, putative, expressed	7.54825	5.26872		5.58031	6.82967
1	40679577	40683903	LOC_Os01g70260	Os01g0927500	receptor-like protein kinase 2 precursor, putative, expressed	7.59833	2.024	Down (pval = 0.0041)	4.55306	4.69792
1	40695642	40700998	LOC_Os01g70270	Os01g0927600	auxin response factor, putative, expressed	137.811	190.708		163.659	158.87
1	40704794	40705722	LOC_Os01g70280	Os01g0927700	expressed protein	#N/A	#N/A		#N/A	#N/A
1	40706975	40708123	LOC_Os01g70290	Os01g0927800	expressed protein	#N/A	#N/A		#N/A	#N/A
1	40708640	40712960	LOC_Os01g70300	Os01g0927900	aspartokinase 3, chloroplast precursor, putative, expressed	22.4743	19.0003		21.1556	19.2468
1	40714145	40717179	LOC_Os01g70310	Os01g0928000	inducer of CBF expression 2, putative, expressed	19.8434	19.8718		18.7684	17.7223
1	40723385	40730507	LOC_Os01g70320	Os01g0928100	expressed protein	37.5649	30.3494		32.9277	32.7453
1	40739077	40743760	LOC_Os01g70330	Os01g0928300	prefoldin subunit family protein, expressed	12.4012	3.59779	Down (pval = 1.23E-05)	10.5837	9.19698
1	40744003	40750822	LOC_Os01g70340	Os01g0928400	expressed protein	0.913585	0		1.02687	0.912207
1	40755754	40756885	LOC_Os01g70350	None	expressed protein	#N/A	#N/A		#N/A	#N/A
1	40759332	40763911	LOC_Os01g70360	Os01g0928600	serine palmitoyltransferase 2, putative, expressed	0	0		0	0
1	40766918	40771614	LOC_Os01g70370	Os01g0928700	serine palmitoyltransferase 2, putative, expressed	0	0		0	0
1	40774498	40778604	LOC_Os01g70380	Os01g0928800	serine palmitoyltransferase 2, putative, expressed	13.8272	11.1833		14.581	13.5978
1	40780344	40784885	LOC_Os01g70390	Os01g0929000	expressed protein	24.4727	12.0713		12.232	17.3139
1	40785124	40787220	LOC_Os01g70400	Os01g0929100	expressed protein	138.64	178.005		255.195	270.483
1	40786166	40790611	LOC_Os01g70410	Os01g0929200	protein kinase, putative, expressed	4.3782	4.31263		5.43984	5.1349
1	40794124	40796977	LOC_Os01g70430	Os01g0929500	oxidoreductase, short chain dehydrogenase/reductase family domain containing protein, expressed	7.24806	4.96652		6.65536	7.07069
1	40797873	40798525	LOC_Os01g70440	Os01g0929600	LEML1 - Anther-specific LEM1 family protein precursor, expressed	0	0		0	0
1	40802646	40804651	LOC_Os01g70450	Os01g0929967	expressed protein	0	0		0.286799	0
1	40807102	40809380	LOC_Os01g70460	Os01g0930000	expressed protein	28.9469	30.1324		25.3484	32.0565
1	40812543	40814133	LOC_Os01g70470	Os01g0930200	expressed protein	102.269	92.5506		121.619	122.676
1	40822280	40823822	LOC_Os01g70480	Os01g0930300	expressed protein	1.0259	0.281759		0.416463	0.391506
1	40825681	40830301	LOC_Os01g70490	Os01g0930400	potassium transporter, putative, expressed (OsHAK5)	0.349418	1.89684		0.493945	1.23802
1	40833544	40834861	LOC_Os01g70500	Os01g0930500	expressed protein	0.900781	1.26386		0.971896	0.96545
1	40842274	40848348	LOC_Os01g70520	Os01g0930800	Os1bglu5 - beta-glucosidase homologue, similar to G. max isohydroxyurate hydrolase, expressed	103.298	150.056		148.259	137.853
1	40849226	40850197	LOC_Os01g70525	Os01g0930900	tropinone reductase, putative, expressed	0	0		0	0
1	40858427	40861921	LOC_Os01g70550	Os01g0931100	heparan-alpha-glucosaminide N-acetyltransferase, putative, expressed	12.534	25.8145	Up (pval = 0.0232)	27.9962	29.1037
1	40862786	40864400	LOC_Os01g70560	Os01g0931200	expressed protein	32.4346	0.40634	Down (pval = 0.0143)	10.1675	18.9667
1	40864908	40868356	LOC_Os01g70570	Os01g0931300	acyltransferase, putative, expressed	10.7911	10.2508		12.0212	10.0377
1	40868708	40871884	LOC_Os01g70580	Os01g0931400	thiamin pyrophosphokinase 1, putative, expressed	6.90795	4.97115		6.71345	5.70665
1	40875375	40876289	LOC_Os01g70590	Os01g0931600	DUF567 domain containing protein, putative, expressed	0.983125	0.386275		0.175956	0.24658
1	40877137	40881181	LOC_Os01g70600	Os01g0931700	DUF567 domain containing protein, putative, expressed	0.510832	1.02695		0.267506	0
1	40881782	40882099	LOC_Os01g70610	Os01g0931800	conserved hypothetical protein	#N/A	#N/A		#N/A	#N/A
1	40883179	40883403	LOC_Os01g70620	None	hypothetical protein	#N/A	#N/A		#N/A	#N/A
1	40897653	40898496	LOC_Os01g70640	Os01g0932300	expressed protein	#N/A	#N/A		#N/A	#N/A
1	40899421	40899846	LOC_Os01g70650	Os01g0932400	subtilisin N-terminal Region family protein, expressed	#N/A	#N/A		#N/A	#N/A
1	40902493	40907438	LOC_Os01g70660	Os01g0932500	potassium transporter, putative, expressed (OsHAK6)	0	0.023089		0	0
1	40915335	40920785	LOC_Os01g70670	Os01g0932600	BTBM1 - Bric-a-Brac, Tramtrack, Broad Complex BTB domain with Meprin and TRAF Homology MATH domain, expressed	23.7948	25.1043	Up (pval = 0.0331)	29.0311	30.9126
1	40921899	40922318	LOC_Os01g70680	Os01g0932700	DEF1 - Defensin and Defensin-like DEFL family, expressed	0	0		0	0
1	40923718	40924053	LOC_Os01g70690	Os01g0932950	RALFL1 - Rapid ALkalinization Factor RALF family protein precursor, putative, expressed	0.968609	0.238298		0.954154	0.650604
1	40926204	40929357	LOC_Os01g70700	None	expressed protein	#N/A	#N/A		#N/A	#N/A
1	40930493	40932733	LOC_Os01g70710	Os01g0933200	heavy metal-associated domain containing protein, expressed	32.9395	40.1067		66.6907	52.5403
1	40937817	40941018	LOC_Os01g70720	Os01g0933400	expressed protein	0.712708	0.325724		0.577879	0.33817
1	40942204	40943109	LOC_Os01g70730	Os01g0933500	flowering promoting factor-like 1, putative, expressed	8.64213	6.92614		4.13985	6.34686
1	40947071	40949593	LOC_Os01g70740	Os01g0933600	expressed protein	57.6842	66.1391		57.6467	55.9888
1	40962401	40964248	LOC_Os01g70770	Os01g0933900	glutathione S-transferase, putative, expressed	36.6143	28.0042		26.4417	25.5648
1	40966659	40971092	LOC_Os01g70780	Os01g0934000	WD40-like domain containing protein, putative, expressed	20.2643	17.7778		24.1619	21.4971
1	40973255	40974782	LOC_Os01g70790	Os01g0934100	SRC2 protein, putative, expressed	83.7678	40.828		85.9686	94.0413
1	40978433	40983586	LOC_Os01g70800	Os01g0934200	mitochondrial carrier protein, putative, expressed	36.6216	39.9273		41.8848	39.2307
1	40984436	40992970	LOC_Os01g70810	Os01g0934300	homeobox domain containing protein, expressed	21.3722	19.6548		23.187	24.1855
1	40994303	40997132	LOC_Os01g70820	Os01g0934400	lumenal PsbP, putative, expressed	148.922	193.361		146.172	132.108
1	40999828	41000884	LOC_Os01g70830	Os01g0934600	esterase PIR7A, putative, expressed	0.155301	0.0101375		0.861323	0.360931
1	41002434	41004063	LOC_Os01g70840	Os01g0934700	esterase, putative, expressed	0.0467135	0.0063		0.108665	0.092158
1	41004305	41006137	LOC_Os01g70850	Os01g0934800	esterase, putative, expressed	6.71512	6.05523		9.28538	4.81143
1	41007321	41009242	LOC_Os01g70860	Os01g0934900	esterase, putative, expressed	9.91111	4.83164		6.94395	7.97346
1	41011306	41015063	LOC_Os01g70870	Os01g0935000	ZOS1-23 - C2H2 zinc finger protein, expressed	0.0533095	0		0.066668	0.0266595
1	41021478	41021912	LOC_Os01g70880	Os01g0935100	histone-like transcription factor and archaeal histone, putative, expressed	#N/A	#N/A		#N/A	#N/A
1	41028601	41030025	LOC_Os01g70890	Os01g0935200	histone-like transcription factor and archaeal histone, putative, expressed	3.37233	0.592623		1.50373	1.72436
1	41052359	41056649	LOC_Os01g70920	Os01g0935300	cullin-1, putative, expressed	7.5379	3.22925		5.37355	5.01664
1	41057016	41058872	LOC_Os01g70930	Os01g0935400	leucoanthocyanidin dioxygenase, putative, expressed	5.49079	2.57902		5.92293	4.74363
1	41061091	41067527	LOC_Os01g70940	Os01g0935500	potassium transporter, putative, expressed (OsHAK2)	10.9229	9.4331		12.5153	13.0071
1	41066583	41070764	LOC_Os01g70950	Os01g0935600	spermatogenesis-associated protein 20 precursor, putative, expressed	51.0099	74.6089	Up	56.2493	40.9581
1	41074429	41079281	LOC_Os01g70960	Os01g0935700	cytochrome c1-1, heme protein, mitochondrial precursor, putative, expressed	36.5303	40.982		41.9004	39.97
1	41079469	41082009	LOC_Os01g70970	Os01g0935800	protein kinase, putative, expressed	6.76663	8.62167		2.10674	5.55902
1	41085901	41088168	LOC_Os01g70980	Os01g0935900	expressed protein	100.712	71.5507		124.294	114.647
1	41090303	41090680	LOC_Os01g70990	Os01g0936000	OsGrx_C6 - glutaredoxin subgroup III, expressed	0.14858	0		0	0.143953
1	41095905	41100367	LOC_Os01g71000	Os01g0936100	protein kinase APK1B, chloroplast precursor, putative, expressed	21.6717	24.8245		41.2213	29.8286
1	41100496	41105056	LOC_Os01g71010	Os01g0936200	lipase precursor, putative, expressed	14.3591	14.9226		18.0609	13.9269
1	41106628	41106936	LOC_Os01g71020	Os01g0936400	expressed protein	#N/A	#N/A		#N/A	#N/A
1	41112004	41114858	LOC_Os01g71040	Os01g0936700	expressed protein	0.262067	0.266178		0	0.182256
1	41116985	41122312	LOC_Os01g71050	Os01g0936800	MSP domain containing protein, putative, expressed	50.1209	43.7613		75.8912	58.1724
1	41126094	41127677	LOC_Os01g71060	Os01g0936900	xylanase inhibitor, putative, expressed	0.0231125	0		0	0.018301
