# Supplementary material for: Identification of Candidate Genes for Salt Tolerance at Seedling Stage in Rice Using QTL-Seq and Chromosome Segment Substitution Line-Derived Population
Source: MDPI journal article supplement (doi:10.3390/agronomy14050929), 2024-04-28
Supplement: s1 [file s1 › Table S3 - SNPs with effects.xlsx]

## Sheet: Sheet1
Table S3 Candidate genes that contain SNPs or Indels with an effect.
Chr	Pos	KDML105	KD-CSSL106	W00178	S bulk	T bulk	delta	SNP_ID	REF	ATL	Effect Seq. Ontology	Impact	Gene name	Description
1	40253628	C/C	G/G	G/G	0.923077	0.166667		Chr1_40253628	G	C	missense_variant	MODERATE	LOC_Os01g69260	hypothetical protein
1	40257399	C/C	G/G	G/G				Chr1_40257399	G	C,*	missense_variant	MODERATE	LOC_Os01g69270	OsFBO2 - F-box and other domain containing protein, expressed
1	40258395	GCCT/GCCT	G/G	G/G				Chr1_40258395	G	GCCT	disruptive_inframe_insertion	MODERATE	LOC_Os01g69270	OsFBO2 - F-box and other domain containing protein, expressed
1	40276402	G/G	A/A	A/A				Chr1_40276402	A	G	missense_variant	MODERATE	LOC_Os01g69279	expressed protein
1	40276437	A/A	G/G	G/G				Chr1_40276437	G	A	missense_variant	MODERATE	LOC_Os01g69279	expressed protein
1	40285839	T/T	G/G	G/G				Chr1_40285839	G	T	missense_variant	MODERATE	LOC_Os01g69290	antifreeze glycoprotein, putative, expressed	down-regulated
1	40334953	G/G	T/T	T/T				Chr1_40334953	T	G	missense_variant	MODERATE	LOC_Os01g69830	OsSPL2 - SBP-box gene family member, expressed
1	40344634	C/C	T/T	T/T	0.714286	0.166667		Chr1_40344634	T	C	missense_variant	MODERATE	LOC_Os01g69850	OsMADS65 - MADS-box family gene with MIKC* type-box, expressed
1	40344664	C/C	T/T	T/T				Chr1_40344664	T	C	missense_variant	MODERATE	LOC_Os01g69850	OsMADS65 - MADS-box family gene with MIKC* type-box, expressed
1	40362268	A/A	G/G	G/G				Chr1_40362268	G	A	missense_variant	MODERATE	LOC_Os01g69850	OsMADS65 - MADS-box family gene with MIKC* type-box, expressed
1	40362776	A/A	C/C	C/C	0.8	0.333333		Chr1_40362776	C	A	missense_variant	MODERATE	LOC_Os01g69850	OsMADS65 - MADS-box family gene with MIKC* type-box, expressed
1	40363925	G/G	GAGGA/GAGGA	GAGGA/GAGGA				Chr1_40363925	GAGGA	G	frameshift_variant	HIGH	LOC_Os01g69850	OsMADS65 - MADS-box family gene with MIKC* type-box, expressed
1	40372330	A/A	C/C	C/C				Chr1_40372330	C	A	missense_variant	MODERATE	LOC_Os01g69870	expressed protein
1	40372372	G/G	C/C	C/C	0.6	0.307692		Chr1_40372372	C	G	missense_variant	MODERATE	LOC_Os01g69870	expressed protein
1	40372375	C/C	T/T	T/T	0.6	0.307692		Chr1_40372375	T	C	splice_donor_variant&intron_variant	HIGH	LOC_Os01g69870	expressed protein
1	40397530	G/G	C/C	C/C	0.75	0.571429		Chr1_40397530	C	G	missense_variant	MODERATE	LOC_Os01g69910	calmodulin-binding transcription activator, putative, expressed
1	40400006	A/A	C/C	C/C				Chr1_40400006	C	A	missense_variant	MODERATE	LOC_Os01g69910	calmodulin-binding transcription activator, putative, expressed
1	40401258	A/A	G/G	G/G	0.818182	0.375		Chr1_40401258	G	A	missense_variant	MODERATE	LOC_Os01g69910	calmodulin-binding transcription activator, putative, expressed
1	40402065	G/G	A/A	A/A	0.777778	0.3125		Chr1_40402065	A	G	missense_variant	MODERATE	LOC_Os01g69910	calmodulin-binding transcription activator, putative, expressed
1	40402297	T/T	C/C	C/C	0.857143	0.5		Chr1_40402297	C	T	missense_variant	MODERATE	LOC_Os01g69910	calmodulin-binding transcription activator, putative, expressed
1	40402429	G/G	A/A	A/A	0.823529	0.25		Chr1_40402429	A	G	missense_variant	MODERATE	LOC_Os01g69910	calmodulin-binding transcription activator, putative, expressed
1	40402459	A/A	G/G	G/G	0.75	0.357143		Chr1_40402459	G	A	missense_variant	MODERATE	LOC_Os01g69910	calmodulin-binding transcription activator, putative, expressed
1	40402504	G/G	A/A	A/A	0.695652	0.285714		Chr1_40402504	A	G	missense_variant	MODERATE	LOC_Os01g69910	calmodulin-binding transcription activator, putative, expressed
1	40402573	G/G	A/A	A/A				Chr1_40402573	A	G	missense_variant	MODERATE	LOC_Os01g69910	calmodulin-binding transcription activator, putative, expressed
1	40406260	G/G	A/A	A/A	0.454545	0.363636		Chr1_40406260	A	G	missense_variant	MODERATE	LOC_Os01g69920	histidine kinase, putative, expressed	up-regulated	Ito and Kurata, 2006
1	40440883	C/C	A/A	A/A	0.380952	0.125		Chr1_40440883	C	A	missense_variant	MODERATE	LOC_Os01g69930	dnaJ domain containing protein, expressed	up-regulated
1	40443541	C/C	A/A	A/A				Chr1_40443541	C	A	missense_variant	MODERATE	LOC_Os01g69940	OsFBX32 - F-box domain containing protein, expressed
1	40453979	A/A	C/C	C/C	0.909091	0.333333		Chr1_40453979	C	A	missense_variant	MODERATE	LOC_Os01g69950	ribosomal protein L27, putative, expressed
1	40460558	A/A	G/G	G/G				Chr1_40460558	A	G	missense_variant	MODERATE	LOC_Os01g69960	expressed protein
1	40486877	T/T	G/G	G/G				Chr1_40486877	G	T	missense_variant	MODERATE	LOC_Os01g69990	GYF domain containing protein, putative, expressed
1	40486943	A/A	ATGT/ATGT	ATGT/ATGT				Chr1_40486943	A	ATGT	disruptive_inframe_insertion	MODERATE	LOC_Os01g69990	GYF domain containing protein, putative, expressed
1	40494013	G/G	GAGTGTTGGAAAGGAACAAGGAATAATACGGCGGCCCGGAGATGA/GAGTGTTGGAAAGGAACAAGGAATAATACGGCGGCCCGGAGATGA	GAGTGTTGGAAAGGAACAAGGAATAATACGGCGGCCCGGAGATGA/GAGTGTTGGAAAGGAACAAGGAATAATACGGCGGCCCGGAGATGA				Chr1_40494013	GAGTGTTGGAAAGGAACAAGGAATAATACGGCGGCCCGGAGATGA	G	frameshift_variant&start_lost	HIGH	LOC_Os01g70000	expressed protein
1	40526762	T/T	G/G	G/G				Chr1_40526762	G	T	missense_variant	MODERATE	LOC_Os01g70050	OsSAUR3 - Auxin-responsive SAUR gene family member, expressed	down-regulated
1	40526938	G/G	C/C	C/C				Chr1_40526938	C	G	missense_variant	MODERATE	LOC_Os01g70050	OsSAUR3 - Auxin-responsive SAUR gene family member, expressed
1	40556756	C/C	CA/CA	CA/CA	0.714286	0.357143		Chr1_40556756	CA	C	frameshift_variant	HIGH	LOC_Os01g70080	NB-ARC domain containing protein, expressed
1	40556758	G/G	GC/GC	GC/GC	0.666667	0.307692		Chr1_40556758	GC	G	frameshift_variant	HIGH	LOC_Os01g70080	NB-ARC domain containing protein, expressed
1	40556761	T/T	TC/TC	TC/TC	0.777778	0.416667		Chr1_40556761	TC	T	frameshift_variant	HIGH	LOC_Os01g70080	NB-ARC domain containing protein, expressed
1	40556763	G/G	A/A	A/A	0.714286	0.416667		Chr1_40556763	A	G	missense_variant	MODERATE	LOC_Os01g70080	NB-ARC domain containing protein, expressed
1	40557831	G/G	A/A	A/A	0.8	0.333333		Chr1_40557831	G	A	missense_variant	MODERATE	LOC_Os01g70080	NB-ARC domain containing protein, expressed
1	40563787	T/T	G/G	G/G	0.8	0.166667		Chr1_40563787	G	T,C	missense_variant	MODERATE	LOC_Os01g70090	enoyl-CoA hydratase/isomerase family protein, putative, expressed
1	40568751	C/C	T/T	T/T	0.8	0.166667		Chr1_40568751	T	C	missense_variant	MODERATE	LOC_Os01g70100	zinc finger DHHC domain-containing protein, putative, expressed
1	40572974	A/A	G/G	G/G	0.727273	0.333333		Chr1_40572974	A	G	missense_variant	MODERATE	LOC_Os01g70110	No apical meristem protein, putative, expressed
1	40584495	T/T	G/G	G/G	0.5	0.375		Chr1_40584495	G	T	missense_variant	MODERATE	LOC_Os01g70120	expressed protein
1	40584714	G/G	A/A	A/A				Chr1_40584714	G	A	missense_variant	MODERATE	LOC_Os01g70120	expressed protein
1	40584718	C/C	A/A	A/A				Chr1_40584718	C	A	missense_variant	MODERATE	LOC_Os01g70120	expressed protein
1	40584728	G/G	T/T	T/T				Chr1_40584728	G	T	missense_variant	MODERATE	LOC_Os01g70120	expressed protein
1	40585106	CTCCTCCTCG/CTCCTCCTCG	C/C	C/C	0.857143	0.4		Chr1_40585106	C	CTCCTCCTCG,CTCCTCCTCCTCG,CTCCTCG,G,CTCG,CTCCTCCTCCTCCTCCTCG	missense_variant	MODERATE	LOC_Os01g70120	expressed protein
1	40610933	A/A	C/C	C/C				Chr1_40610933	C	A	missense_variant	MODERATE	LOC_Os01g70170	transaldolase, putative, expressed
1	40611906	A/A	T/T	T/T	0.5	0.615385		Chr1_40611906	A	T	missense_variant	MODERATE	LOC_Os01g70170	transaldolase, putative, expressed
1	40617122	AATCCAC/AATCCAC	A/A	A/A	0.857143	0.4		Chr1_40617122	AATCCAC	A,AATCCACATCCAC	conservative_inframe_insertion	MODERATE	LOC_Os01g70180	exostosin family domain containing protein, expressed
1	40619172	A/A	C/C	C/C				Chr1_40619172	C	A	missense_variant	MODERATE	LOC_Os01g70180	exostosin family domain containing protein, expressed
1	40663740	C/C	T/T	T/T	0.666667	0.3125		Chr1_40663740	C	T	missense_variant	MODERATE	LOC_Os01g70220	histone-lysine N-methyltransferase, putative, expressed	up-regulated
1	40666344	A/A	AACGGCGACGGCG/AACGGCGACGGCG	AACGGCGACGGCG/AACGGCGACGGCG				Chr1_40666344	AACGGCGACGGCG	A	conservative_inframe_deletion	MODERATE	LOC_Os01g70230	transcription factor, putative, expressed
1	40675241	G/G	A/A	A/A				Chr1_40675241	A	G	stop_lost	HIGH	LOC_Os01g70250	heat shock protein DnaJ, putative, expressed
1	40680299	C/C	CCCT/CCCT	CCCT/CCCT				Chr1_40680299	CCCT	C	disruptive_inframe_deletion	MODERATE	LOC_Os01g70260	receptor-like protein kinase 2 precursor, putative, expressed
1	40698645	T/T	A/A	A/A				Chr1_40698645	T	A	missense_variant	MODERATE	LOC_Os01g70270	auxin response factor, putative, expressed
1	40704806	T/T	C/C	C/C				Chr1_40704806	C	T	missense_variant	MODERATE	LOC_Os01g70280	expressed protein
1	40704827	GT/GT	G/G	G/G				Chr1_40704827	GT	G	frameshift_variant	HIGH	LOC_Os01g70280	expressed protein
1	40704883	T/T	G/G	G/G				Chr1_40704883	G	T	missense_variant	MODERATE	LOC_Os01g70280	expressed protein
1	40704932	A/A	G/G	G/G				Chr1_40704932	G	A	missense_variant	MODERATE	LOC_Os01g70280	expressed protein
1	40705237	C/C	T/T	T/T				Chr1_40705237	C	T	missense_variant	MODERATE	LOC_Os01g70280	expressed protein
1	40707053	C/C	T/T	T/T				Chr1_40707053	C	T	missense_variant	MODERATE	LOC_Os01g70290	expressed protein
1	40707172	AGCAGGTTTCGGCGAAGCTACACGT/AGCAGGTTTCGGCGAAGCTACACGT	A/A	A/A				Chr1_40707172	AGCAGGTTTCGGCGAAGCTACACGT	A	disruptive_inframe_deletion	MODERATE	LOC_Os01g70290	expressed protein
1	40707502	G/G	A/A	A/A				Chr1_40707502	G	A	missense_variant	MODERATE	LOC_Os01g70290	expressed protein
1	40707587	T/T	C/C	C/C				Chr1_40707587	T	C	missense_variant	MODERATE	LOC_Os01g70290	expressed protein
1	40707707	G/G	A/A	A/A				Chr1_40707707	G	A	missense_variant	MODERATE	LOC_Os01g70290	expressed protein
1	40707722	G/G	T/T	T/T				Chr1_40707722	G	T	missense_variant	MODERATE	LOC_Os01g70290	expressed protein
1	40708013	CATGGCAATGGCA/CATGGCAATGGCA	C/C	C/C				Chr1_40708013	CATGGCAATGGCAATGGCA	CATGGCAATGGCA,C,CATGGCA	disruptive_inframe_deletion	MODERATE	LOC_Os01g70290	expressed protein
1	40710640	G/G	A/A	A/A	0.772727	0.5		Chr1_40710640	G	A	missense_variant	MODERATE	LOC_Os01g70300	aspartokinase 3, chloroplast precursor, putative, expressed
1	40711179	T/T	C/C	C/C	0.782609	0.384615		Chr1_40711179	C	T	missense_variant	MODERATE	LOC_Os01g70300	aspartokinase 3, chloroplast precursor, putative, expressed
1	40712809	G/G	C/C	C/C				Chr1_40712809	G	C,*	missense_variant	MODERATE	LOC_Os01g70300	aspartokinase 3, chloroplast precursor, putative, expressed
1	40715330	A/A	C/C	C/C	0.75	0.416667		Chr1_40715330	C	A	missense_variant	MODERATE	LOC_Os01g70310	inducer of CBF expression 2, putative, expressed	up-regulated
1	40716941	CGGT/CGGT	CGGTGGTGGT/CGGTGGTGGT	CGGTGGTGGT/CGGTGGTGGT				Chr1_40716941	CGGTGGTGGT	CGGT,C	conservative_inframe_deletion	MODERATE	LOC_Os01g70310	inducer of CBF expression 2, putative, expressed
1	40749896	A/A	C/C	C/C				Chr1_40749896	C	A	missense_variant	MODERATE	LOC_Os01g70340	expressed protein
1	40750265	CGCGGCGGCG/CGCGGCGGCG	C/C	C/C				Chr1_40750265	CGCGGCGGCG	C,CGCGGCG	conservative_inframe_deletion	MODERATE	LOC_Os01g70340	expressed protein
1	40761338	A/A	T/T	T/T	0.7	0.428571		Chr1_40761338	T	A	missense_variant	MODERATE	LOC_Os01g70360	serine palmitoyltransferase 2, putative, expressed
1	40762347	C/C	A/A	A/A				Chr1_40762347	C	A	missense_variant	MODERATE	LOC_Os01g70360	serine palmitoyltransferase 2, putative, expressed
1	40796004	G/G	A/A	A/A				Chr1_40796004	A	G	missense_variant	MODERATE	LOC_Os01g70430	oxidoreductase, short chain dehydrogenase/reductase family domain containing protein, expressed
1	40796815	CCGGCGGCGG/CCGGCGGCGG	CCGGCGG/CCGGCGG	CCGGCGG/CCGGCGG	0.625	0.2		Chr1_40796815	CCGGCGG	CCGGCGGCGG,C,CCGG	conservative_inframe_insertion	MODERATE	LOC_Os01g70430	oxidoreductase, short chain dehydrogenase/reductase family domain containing protein, expressed
1	40804278	T/T	C/C	C/C				Chr1_40804278	C	T	missense_variant	MODERATE	LOC_Os01g70450	expressed protein
1	40804564	CGCAGCACTG/CGCAGCACTG	C/C	C/C				Chr1_40804564	CGCAGCACTG	C	conservative_inframe_deletion	MODERATE	LOC_Os01g70450	expressed protein
1	40807303	T/T	C/C	C/C				Chr1_40807303	C	T,*	missense_variant	MODERATE	LOC_Os01g70460	expressed protein
1	40807499	CTATA/CTATA	CTA/CTA	CTA/CTA				Chr1_40807499	C	CTATA,CTCTA,CTA,CTATATA,A	frameshift_variant	HIGH	LOC_Os01g70460	expressed protein
1	40813252	AAGGAGG/AAGGAGG	AAGG/AAGG	AAGG/AAGG				Chr1_40813252	A	AAGGAGG,AAGG	disruptive_inframe_insertion	MODERATE	LOC_Os01g70470	expressed protein
1	40813452	CAGT/CAGT	C/C	C/C				Chr1_40813452	C	CAGT,T	conservative_inframe_insertion	MODERATE	LOC_Os01g70470	expressed protein
1	40823165	T/T	TAAG/TAAG	TAAG/TAAG				Chr1_40823165	TAAG	T	conservative_inframe_deletion	MODERATE	LOC_Os01g70480	expressed protein
1	40860920	G/G	A/A	A/A				Chr1_40860920	A	G	missense_variant	MODERATE	LOC_Os01g70550	heparan-alpha-glucosaminide N-acetyltransferase, putative, expressed
1	40897858	G/G	A/A	A/A	0.5	0.285714		Chr1_40897858	A	G	missense_variant	MODERATE	LOC_Os01g70640	expressed protein
1	40897900	C/C	G/G	G/G				Chr1_40897900	G	C	missense_variant	MODERATE	LOC_Os01g70640	expressed protein
1	40899818	A/A	T/T	T/T	0.6875	0.388889		Chr1_40899818	T	A	missense_variant	MODERATE	LOC_Os01g70650	subtilisin N-terminal Region family protein, expressed
1	40902580	C/C	C/T	T/T				Chr1_40902580	C	T	missense_variant	MODERATE	LOC_Os01g70660	potassium transporter, putative, expressed (OsHAK6)
1	40902721	T/T	G/G	G/G				Chr1_40902721	T	G	missense_variant	MODERATE	LOC_Os01g70660	potassium transporter, putative, expressed (OsHAK6)
1	40922208	TGTG/TGTG	T/T	T/T				Chr1_40922208	TGTG	T	disruptive_inframe_deletion	MODERATE	LOC_Os01g70680	DEF1 - Defensin and Defensin-like DEFL family, expressed
1	40922213	CGGCGGCGGCGGTGGCGGCGGAGGAGGAGGA/CGGCGGCGGCGGTGGCGGCGGAGGAGGAGGA	C/C	C/C				Chr1_40922213	CGGCGGCGGCGGTGGCGGCGGAGGAGGAGGA	C	disruptive_inframe_deletion	MODERATE	LOC_Os01g70680	DEF1 - Defensin and Defensin-like DEFL family, expressed
1	40922218	GC/GC	*/*	*/*				Chr1_40922218	GC	*,G	frameshift_variant	HIGH	LOC_Os01g70680	DEF1 - Defensin and Defensin-like DEFL family, expressed
1	40922221	GC/GC	*/*	*/*				Chr1_40922221	GC	*,G	frameshift_variant	HIGH	LOC_Os01g70680	DEF1 - Defensin and Defensin-like DEFL family, expressed
1	40922224	GTGGCGGCGGAGGAGGAGGAGGCGGCGGC/GTGGCGGCGGAGGAGGAGGAGGCGGCGGC	*/*	*/*				Chr1_40922224	GTGGCGGCGGAGGAGGAGGAGGCGGCGGC	*,G,CTGGCGGCGGAGGAGGAGGAGGCGGCGGC	frameshift_variant	HIGH	LOC_Os01g70680	DEF1 - Defensin and Defensin-like DEFL family, expressed
1	40922243	AGGC/AGGC	*/*	*/*				Chr1_40922243	A	AGGC,C,*	disruptive_inframe_insertion	MODERATE	LOC_Os01g70680	DEF1 - Defensin and Defensin-like DEFL family, expressed
1	40926593	CGACGCGGCAGCAGGCCACCGCGCCGGGTGGGGAGGAGGCGGGAGAGGAGGAGGGCGTCGGTGGCCAGCGGCGGGCGGT/CGACGCGGCAGCAGGCCACCGCGCCGGGTGGGGAGGAGGCGGGAGAGGAGGAGGGCGTCGGTGGCCAGCGGCGGGCGGT	C/C	C/C				Chr1_40926593	CGACGCGGCAGCAGGCCACCGCGCCGGGTGGGGAGGAGGCGGGAGAGGAGGAGGGCGTCGGTGGCCAGCGGCGGGCGGT	C	conservative_inframe_deletion	MODERATE	LOC_Os01g70700	expressed protein
1	40963297	A/A	G/G	G/G	0.75	0.5		Chr1_40963297	A	G	missense_variant	MODERATE	LOC_Os01g70770	glutathione S-transferase, putative, expressed
1	41065438	G/G	T/T	T/T	0.692308	0.5		Chr1_41065438	T	G	missense_variant	MODERATE	LOC_Os01g70940	potassium transporter, putative, expressed (OsHAK2)	up-regulated
1	41080396	C/C	T/T	T/T				Chr1_41080396	C	T	missense_variant	MODERATE	LOC_Os01g70970	protein kinase, putative, expressed
1	41081279	G/G	A/A	A/A				Chr1_41081279	G	A	missense_variant	MODERATE	LOC_Os01g70970	protein kinase, putative, expressed
1	41081678	G/G	C/C	C/C	0.5	0.285714		Chr1_41081678	G	C	missense_variant	MODERATE	LOC_Os01g70970	protein kinase, putative, expressed
1	41112392	A/A	C/C	C/C	0.454545	0.571429		Chr1_41112392	A	C	missense_variant	MODERATE	LOC_Os01g71040	expressed protein
