# Supplementary figures and images for: Identification of Candidate Genes for Salt Tolerance at Seedling Stage in Rice Using QTL-Seq and Chromosome Segment Substitution Line-Derived Population
Source: MDPI journal article supplement (doi:10.3390/agronomy14050929), 2024-04-28

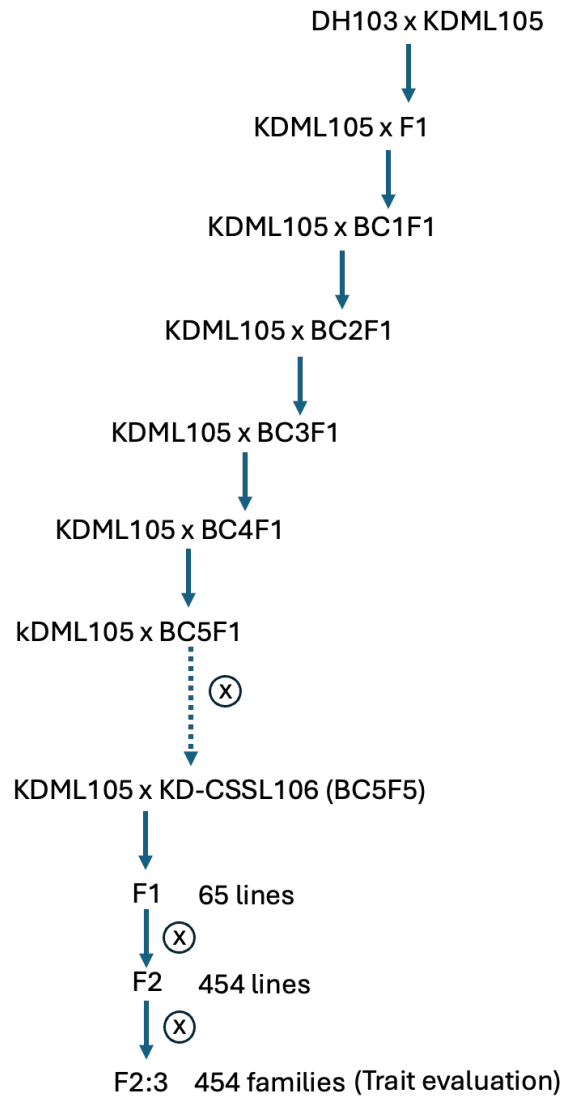

**Figure S1.** Breeding scheme of F2:3 population used in the study.

Supplement: s1 [file s1 › Figure S1 - Breeding scheme of F2.pdf]
